# Supplementary material for: Differentiation between polycystic ovary syndrome and polycystic ovarian morphology by means of an anti-Müllerian hormone cutoff value
Source: PubMed Central journal article supplement — Korean J Intern Med. 2016 Nov 30;32(4):690–8. doi: 10.3904/kjim.2016.038 (PMC5511935; doi:10.3904/kjim.2016.038), 2016-11-30
Supplement: kjim-2016-038-supple.pdf [file kjim-2016-038-supple.pdf]

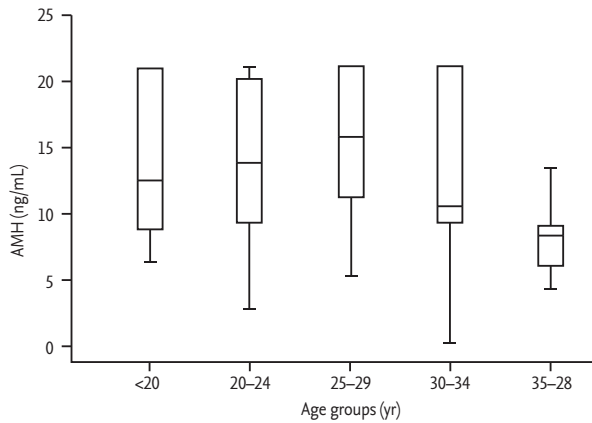

| Age group, yr  | Women with PCOS (n = 207)     |
|----------------|-------------------------------|
| < 20 (n = 25)  | 12.3 (8.5–21.0)               |
| 20–24 (n = 85) | 13.6 (9.1–20.2)               |
| 25–29 (n = 69) | 15.7 (10.9–21.0) <sup>a</sup> |
| 30–34 (n = 21) | 10.5 (8.9–21.0)               |
| 35–38 (n = 7)  | 8.0 (5.5–10.0)                |

**Supplementary Figure 1.** Serum anti-Müllerian hormone (AMH) levels according to age groups in women with polycystic ovary syndrome (PCOS). Values are presented as median (interquartile range). *p* for trend was 0.048. <sup>a</sup>*p* < 0.05 vs. age group with 35 to 38 years.

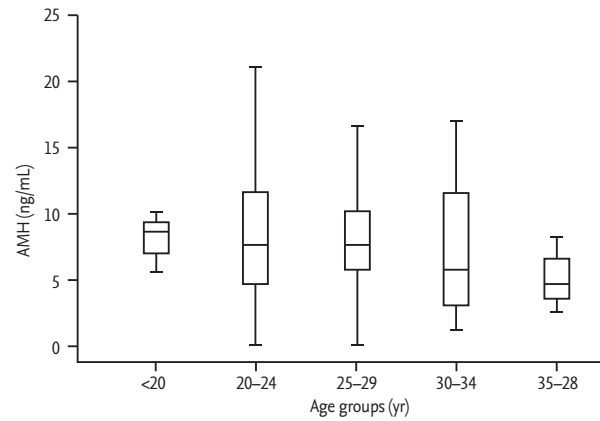

| Age group, yr  | Regular cycling women with normoandrogenemia (n = 220) |
|----------------|--------------------------------------------------------|
| < 20 (n = 12)  | 12.3 (6.8–9.4)                                         |
| 20–24 (n = 97) | 13.6 (4.6–11.8)                                        |
| 25–29 (n = 76) | 15.7 (5.4–10.2)                                        |
| 30–34 (n = 30) | 10.5 (3.0–11.8)                                        |
| 35–38 (n = 5)  | 8.0 (3.0–7.5)                                          |

**Supplementary Figure 2.** Serum anti-Müllerian hormone (AMH) levels according to age groups in regular cycling women with normoandrogenemia. Values are presented as median (interquartile range). *p* for trend was 0.333.
